# Supplementary material
Source: PubMed Central journal article supplement (PMC2654219)

**A**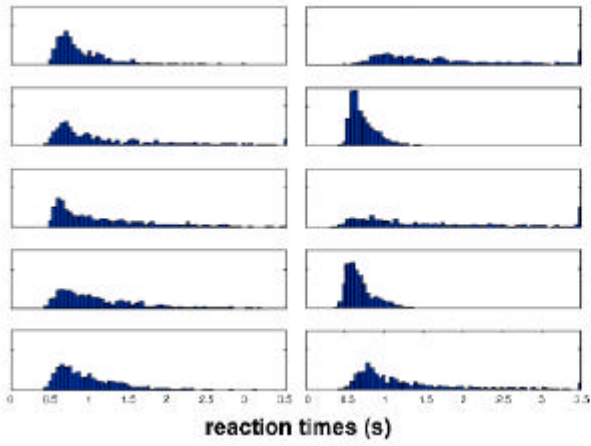**B**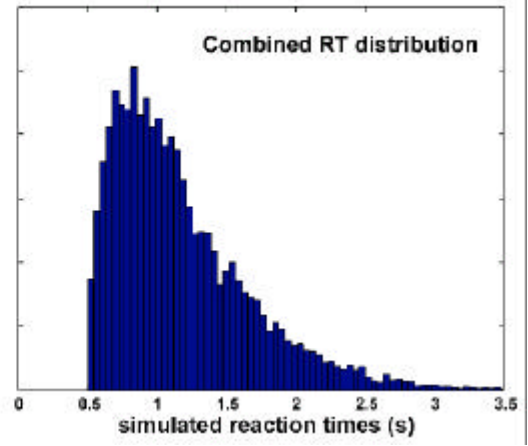

Supplement: NIHMS78510-supplement-01.pdf [file NIHMS78510-supplement-01.pdf]

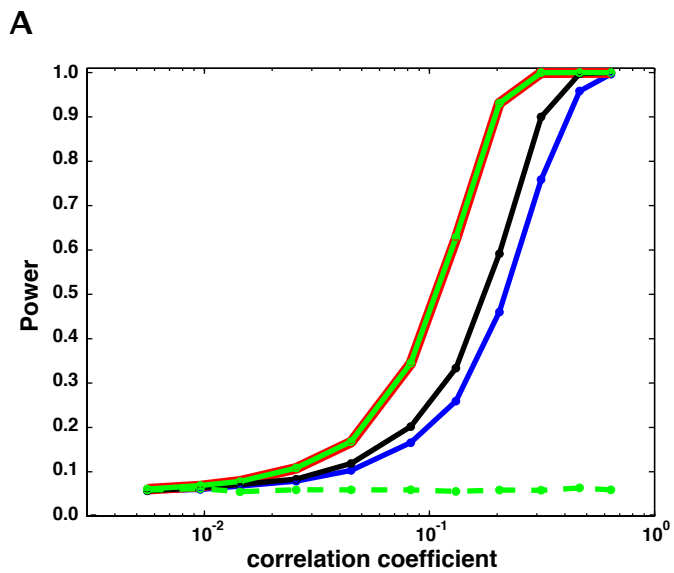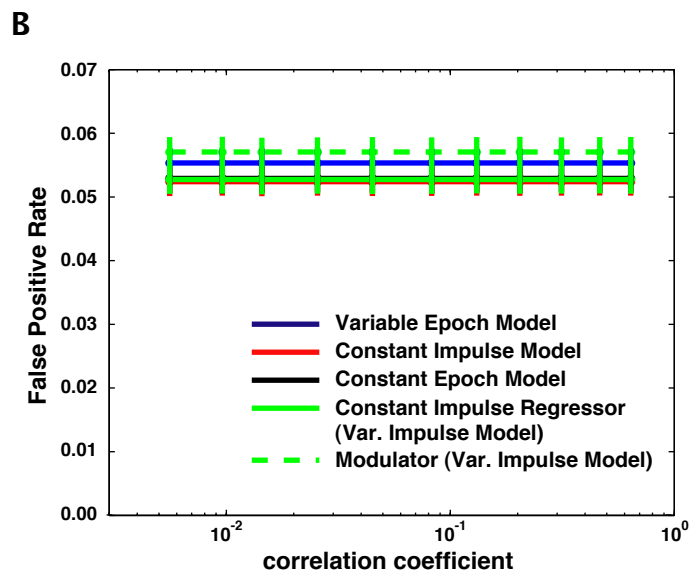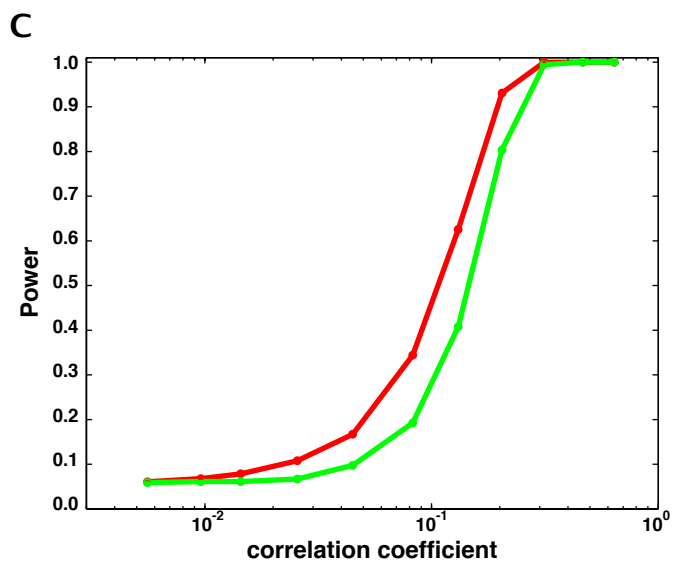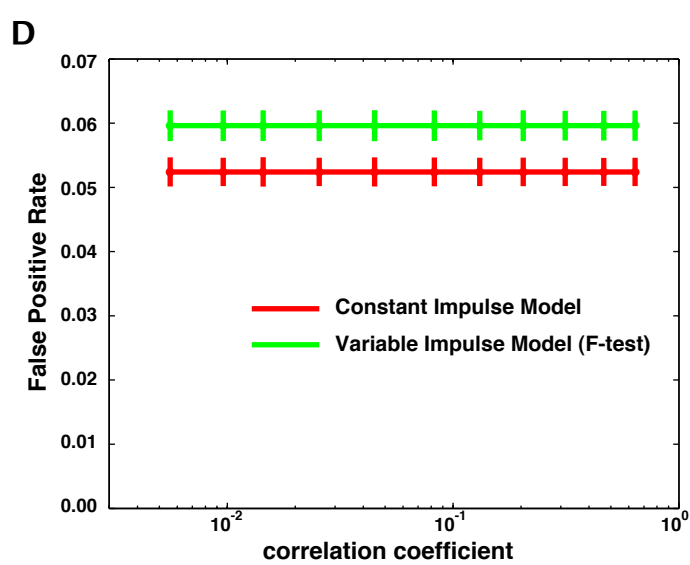

Supplement: NIHMS78510-supplement-02.pdf [file NIHMS78510-supplement-02.pdf]

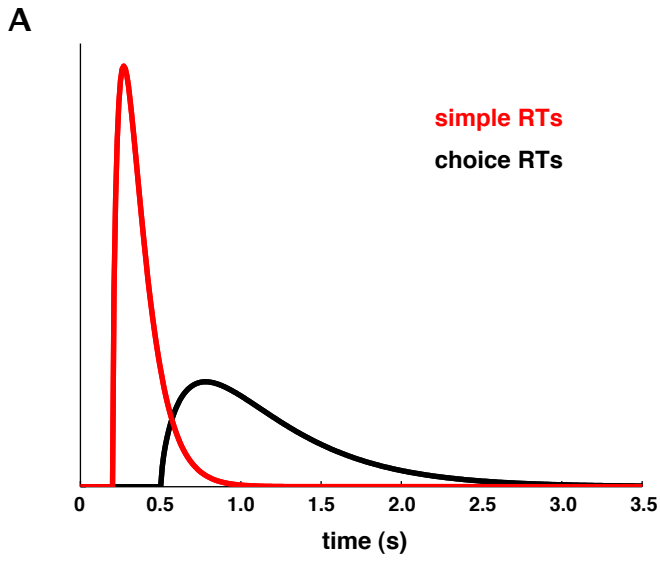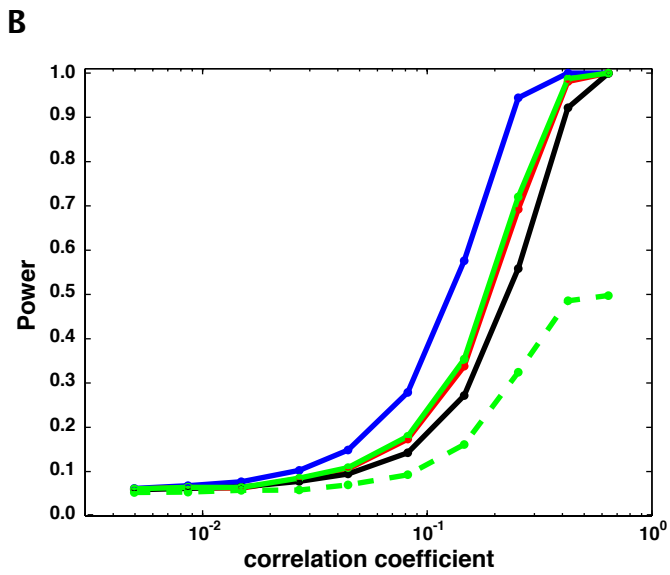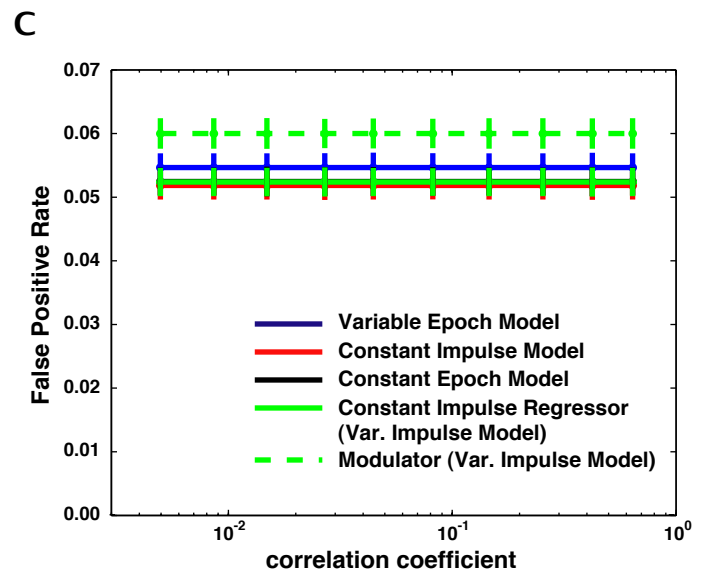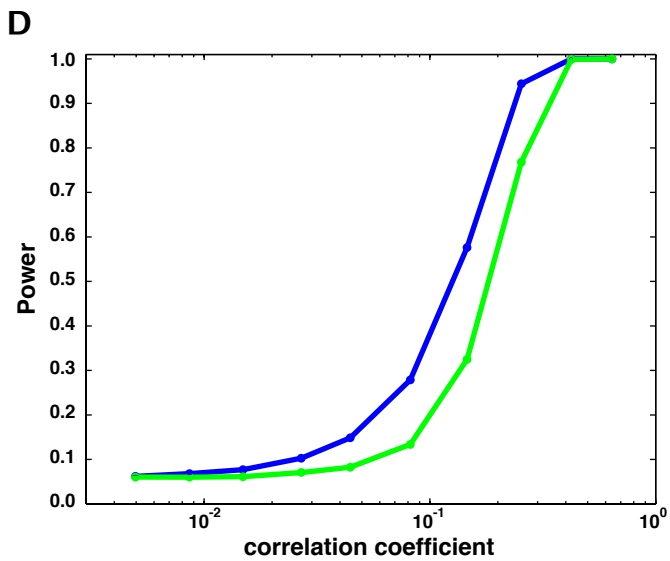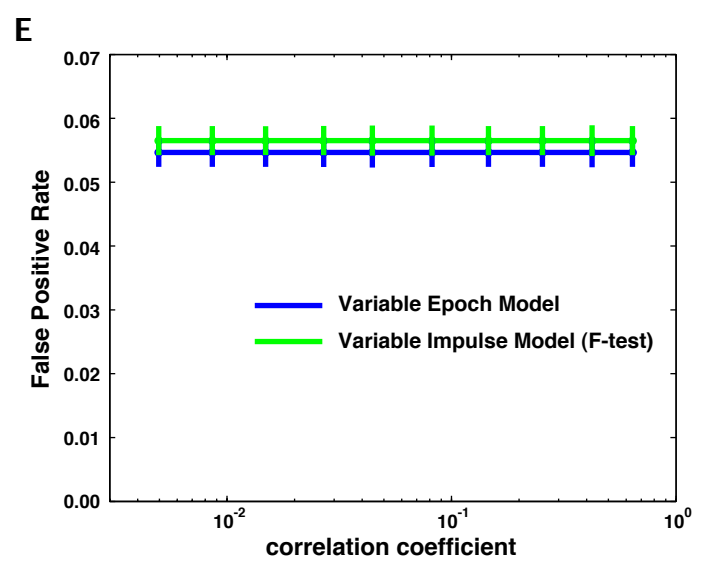

Supplement: NIHMS78510-supplement-03.pdf [file NIHMS78510-supplement-03.pdf]

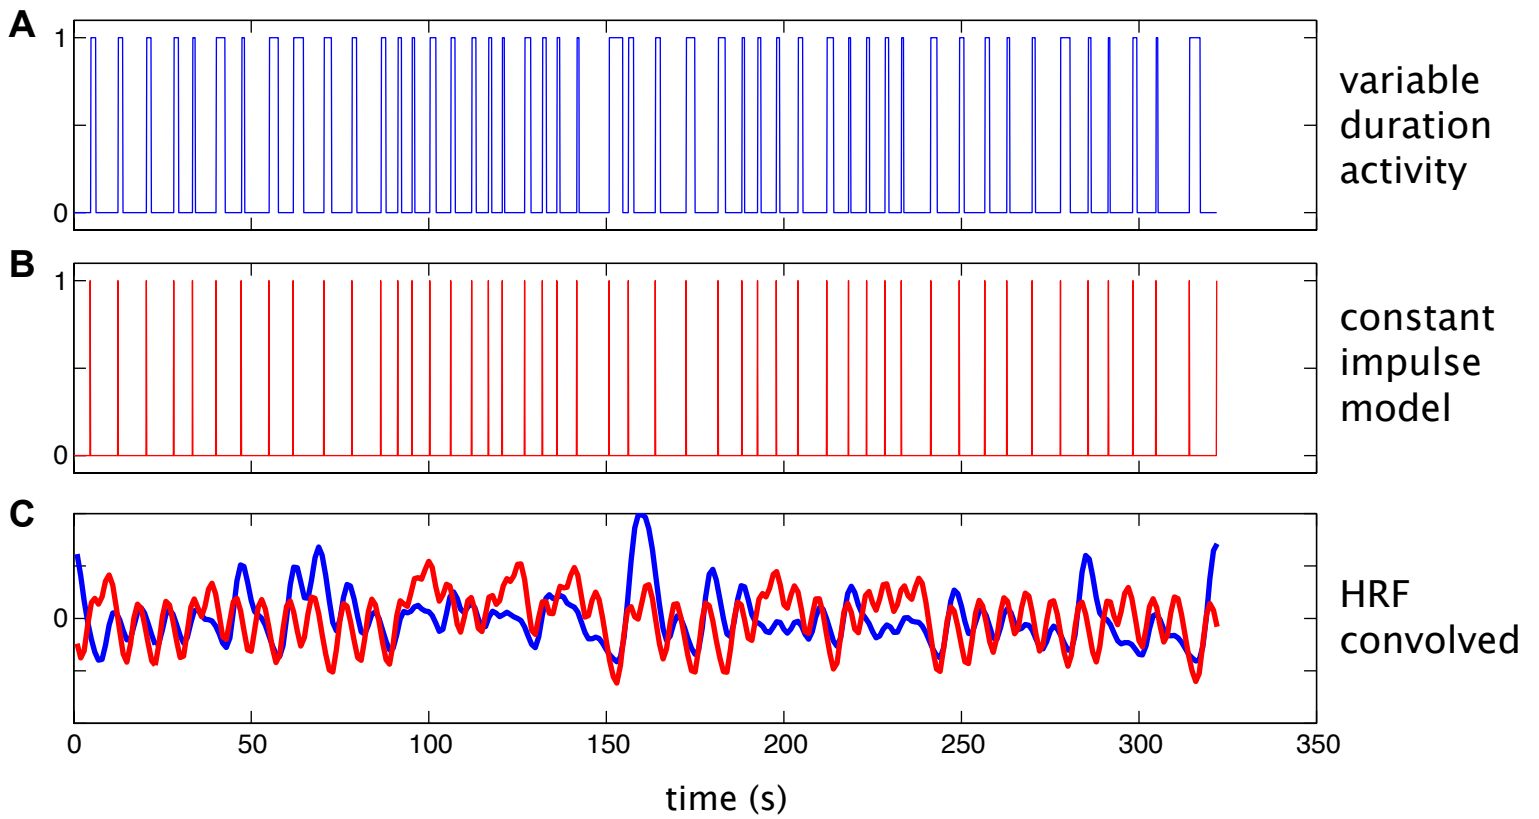

Supplement: NIHMS78510-supplement-04.pdf [file NIHMS78510-supplement-04.pdf]

# Subject Level

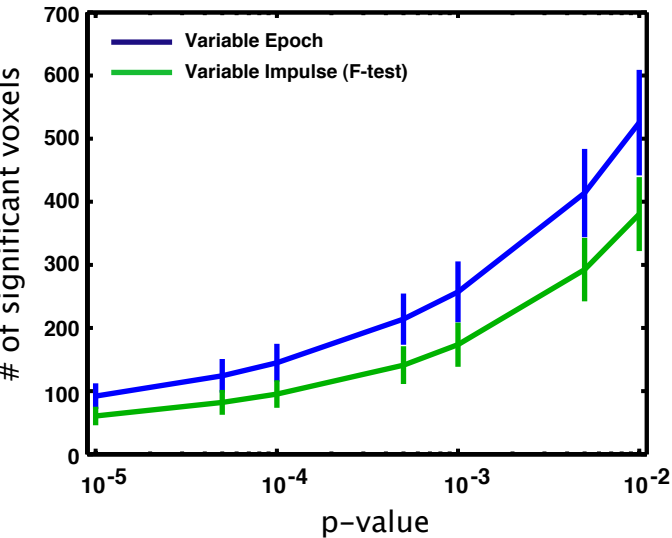

Supplement: NIHMS78510-supplement-05.pdf [file NIHMS78510-supplement-05.pdf]
